# Supplementary material for: Fluorescent hydrogel formation from carboxyphenyl-terpyridine
Source: Royal Society of Chemistry journal article supplement (doi:10.1039/c2cc37842f), 2012-11-29

Electronic Supporting Information

# Fluorescent hydrogel formation from carboxyphenyl-terpyridine<sup>†</sup>

Ashleigh Griffith, Thomas J. Bandy, Mark Light and Eugen Stulz\*

5

## 1. Materials

All starting materials were obtained from Sigma Aldrich UK and used as received. Solvents and metal salts or  
10 bases were obtained from Fisher Scientific UK. Deuterated DMSO was obtained from Apollo Scientific UK and silver tetrafluoroborate was obtained from Acros UK.

## 2. Characterisation Methods and Equipment

15 NMR Spectra (<sup>1</sup>H, <sup>13</sup>C and COSY experiments) were recorded on Bruker DPX400, operating on 400MHz for proton and 101MHz for carbon NMR spectra. Mass Spectrometry was performed on a Waters 2700 Sample Manager. UV-Vis spectra were collected using a Varian Cary Bio 300 with 3 mM concentration in a 0.0125 M aqueous sodium hydroxide solution. Fluorescence spectra were taken on Varian Eclipse, showing emission at 376 nm in the gel and solution state, and an extra peak at 528nm in the gel state. Individual spectra were  
20 recorded at 300-900 nm going from 20 °C to 70 °C and back down to 20 °C at 10 °C intervals, by setting the temperature and scanning after ten minutes equilibration time. Melting curves were taken with variable rate of the temperature increase at 1 °C, 0.5 °C and 0.2 °C per minute. The settings used to collect the data were: excitation: 275 nm (excitation slit: 5 nm), emission: 376 nm and 528 nm (emission slit: 5 nm), averaging time: 1 s. All scanning electron micrographs (SEM) were taken using a Phillips XL30 ESEM, samples were prepared on  
25 the substrate dried under high-vacuum overnight.

## 3. Synthesis of Terpy-Ph-CO<sub>2</sub>K

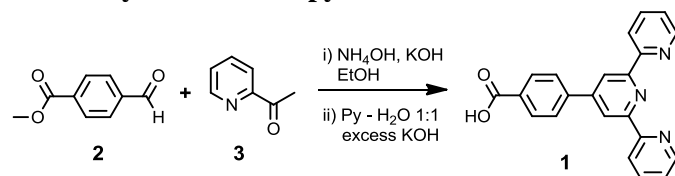

30 Methyl-4-formal-benzoate **2** (2.46g, 15mmol) was dissolved in ethanol (250mL) and 2-acetylpyridine **3** (3.4mL, 30mmol) was added. Aqueous ammonia solution (35% v/v, 3mL, 45mmol) and potassium hydroxide (2.56g, 45mmol) were added to the reaction mixture. The reaction was left to stir overnight, and the reaction mixture had turned an opaque brown colour. Another portion of ammonia was added (35% v/v, 2mL, 30mmol) and after approximately 3 hours, the reaction mixture had turned an opaque orange. A TLC of the reaction showed  
35 formation of one product. The mixture was filtered, giving a white-pink coloured solid. Crystallisation from boiling methanol gave the intermediate ester. MS-ESI (+ve)(C<sub>23</sub>H<sub>17</sub>N<sub>3</sub>O<sub>2</sub>): Mass calcd. 367.132; Found mass 385.3 [M+NH<sub>3</sub>]. R<sub>f</sub> (10% ammonia in methanol): 0.88.

Terpy-Ph-CO<sub>2</sub>Me was dissolved in a pyridine-water mixture (1:1 ratio, 100mL total). Potassium hydroxide (2.43g) was added and the reaction was heated to reflux overnight. The potassium hydroxide was neutralised  
40 with hydrochloric acid (35% v/v, 5mL). As the acid was added a white precipitate was observed, this was collected by filtration and washed with approximately 70mL of water. Yield: 874.6mg (310mmol, 77%). <sup>1</sup>H NMR (400 MHz, DMSO-d<sub>6</sub>): δ ppm 7.55 (ddd, J=6.9, 5.7, 1.0 Hz, 2 H, **2**); 8.06 (m, J=7.6, 1.5 Hz, 4 H, **3 & 10**); 8.16 (d, J=8.6 Hz, 2 H, **11**); 8.70 (d, J=8.1 Hz, 2 H, **4**); 8.77 (s, 2 H, **7**); 8.78 (d, J=4.0 Hz, 1 H, **1**); 13.07 - 13.24

(s, 1 H, **14**). <sup>13</sup>C NMR (101 MHz, DMSO-d<sub>6</sub>): δ ppm 118.44 (CH, **1 or 7**); 121.12 (CH, **4**); 125.04 (CH, **2**); 127.55 (CH, **3**); 130.61 (CH, **11**); 137.92 (CH, **10**); 148.85 (C, **5, 6, 8, 9, 12 or 13**); 149.60 (CH, **1 or 7**); 155.07 (C, **5, 6, 8, 9, 12 or 13**); 156.25 (C, **5, 6, 8, 9, 12 or 13**); 167.18 (C, **5, 6, 8, 9, 12 or 13**). R<sub>f</sub> (10% ammonia in methanol): 0.84. UV-Vis: (1.25M NaOH in water, 30μM): λ<sub>max</sub> 275nm. Emission: λ<sub>em</sub> (relative intensity) - 376nm (1), 528nm (0.4).

#### 4. Gelation experiments

##### Gelation in Methanol

The appropriate weight of Terpy-Ph-CO<sub>2</sub>H **1** was measured into a 3.5mL sample vial, and 0.5mL of the appropriate concentration of sodium hydroxide in methanol was added. The vials were then heated to 70°C in a water bath for fifteen minutes to ensure all the material dissolved. No gel formation was observed.

| Sample Name | Weight of <b>1</b> /mg | Concentration of NaOH / M | Solvent  |
|-------------|------------------------|---------------------------|----------|
| A1          | 2                      | 1                         | Methanol |
| A2          | 3                      | 1                         | Methanol |
| A3          | 5                      | 1                         | Methanol |
| A4          | 3                      | 2                         | Methanol |
| A5          | 5                      | 1.5                       | Methanol |

##### Gelation in Water/NaOH

The appropriate weight of Terpy-Ph-CO<sub>2</sub>H **1** was measured into a 3.5mL sample vial, and the appropriate concentration of sodium hydroxide (0.5mL) in water was added. The vials were then heated above 70°C in a water bath for fifteen minutes to ensure all the material dissolved.

| Sample Name | Weight of <b>1</b> /mg | Concentration of NaOH / M | Solvent |
|-------------|------------------------|---------------------------|---------|
| B1          | 2                      | 1                         | Water   |
| B2          | 3                      | 1                         | Water   |
| B3          | 5                      | 1                         | Water   |
| B4          | 3                      | 2                         | Water   |
| B5          | 5                      | 1.5                       | Water   |
| B6          | 3                      | 0.25                      | Water   |
| B7          | 3                      | 0.5                       | Water   |
| B8          | 5                      | 0.25                      | Water   |
| B9          | 5                      | 0.5                       | Water   |
| B10         | 5                      | 2                         | Water   |
| B11         | 4                      | 0.25                      | Water   |
| B12         | 4                      | 0.5                       | Water   |
| B13         | 4                      | 0.75                      | Water   |
| B14         | 5                      | 0.75                      | Water   |
| B15         | 6                      | 0.5                       | Water   |

|     |    |      |       |
|-----|----|------|-------|
| B16 | 7  | 0.5  | Water |
| B17 | 4  | 1    | Water |
| B18 | 8  | 0.5  | Water |
| B19 | 9  | 0.5  | Water |
| B20 | 6  | 1    | Water |
| B21 | 7  | 1    | Water |
| B22 | 7  | 1.25 | Water |
| B23 | 6  | 0.75 | Water |
| B24 | 7  | 0.75 | Water |
| B25 | 8  | 0.75 | Water |
| B26 | 9  | 0.75 | Water |
| B27 | 10 | 0.5  | Water |
| B28 | 10 | 0.75 | Water |
| B29 | 5  | 1.25 | Water |
| B30 | 7  | 0.25 | Water |
| B31 | 8  | 0.25 | Water |
| B32 | 9  | 0.25 | Water |

### Selected SEM pictures of gels.

B9 fresh:

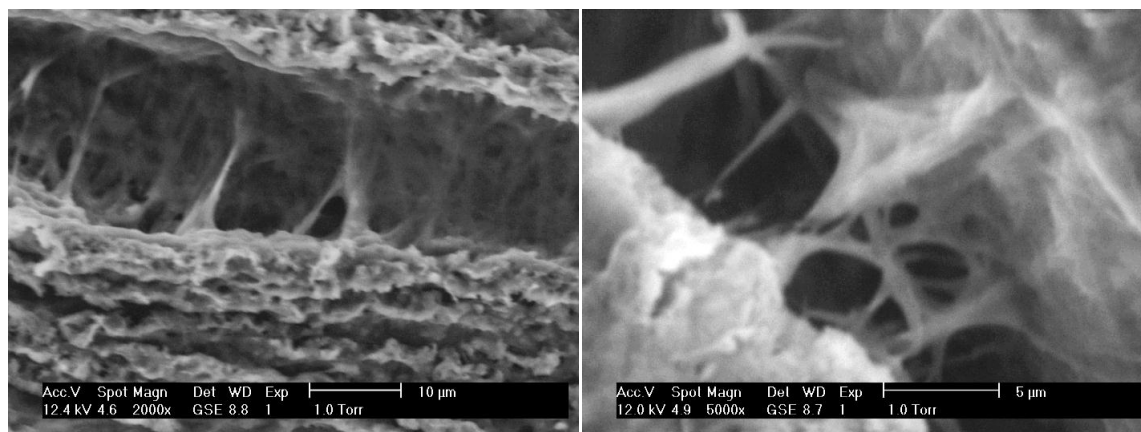

B11 fresh:

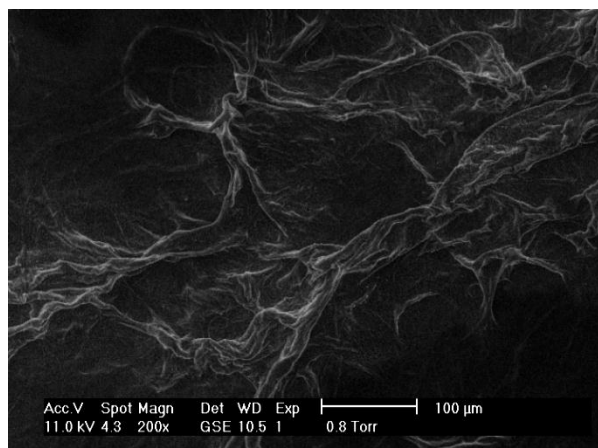

B11 aged three weeks:

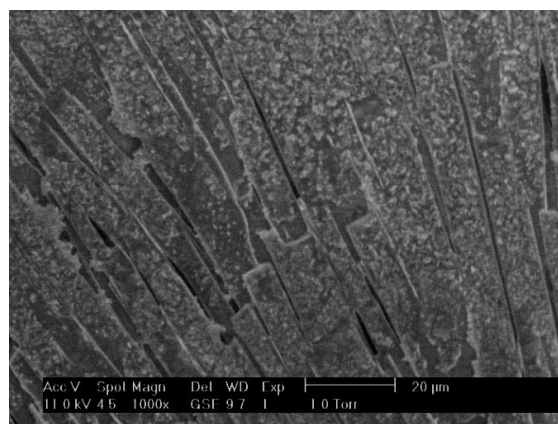

B19 fresh:

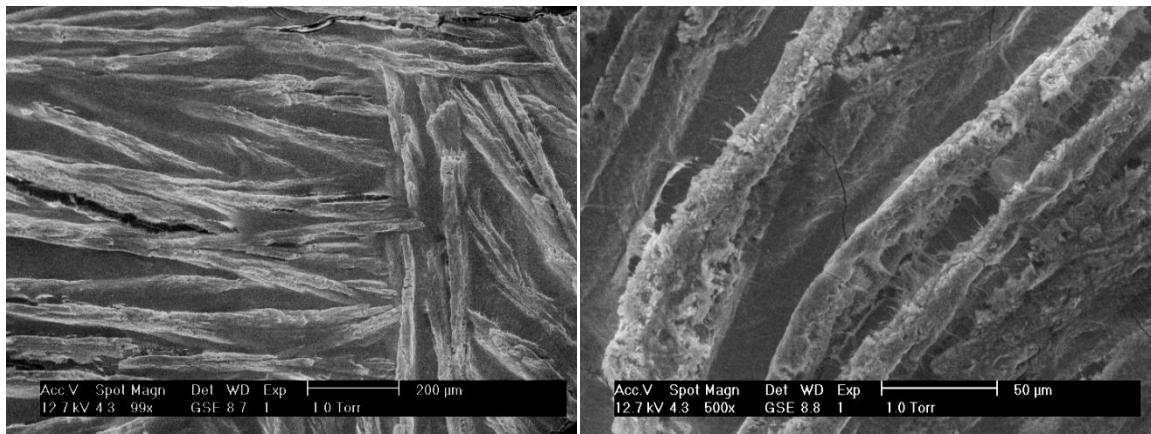

B25 fresh:

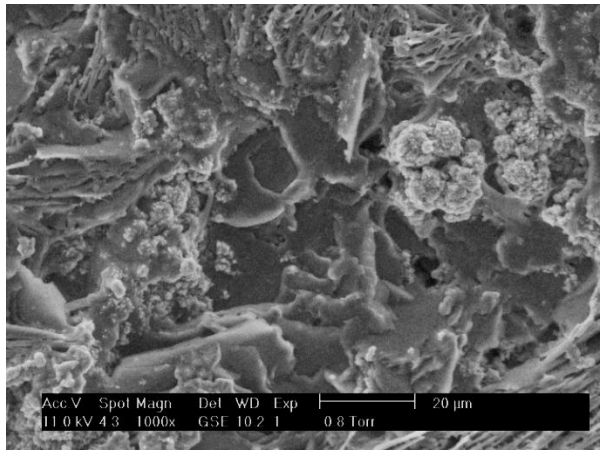

B11 aged three weeks:

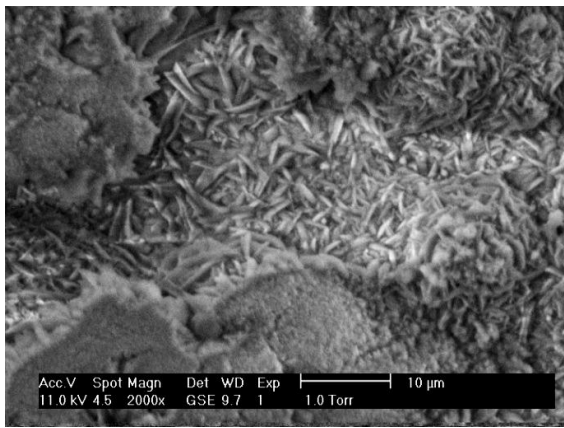

**Gelation with Water/Ammonia**

The appropriate weight of Terpy-Ph-CO<sub>2</sub>H **1** was measured into a 3.5mL sample vial, and the appropriate concentration of ammonium solution (0.5mL) was added. No gel formation was observed.

| Sample Name | Weight of <b>1</b> /mg | Concentration of ammonia / M | Solvent |
|-------------|------------------------|------------------------------|---------|
| C1          | 4                      | 1.5                          | Water   |
| C2          | 4                      | 2                            | Water   |
| C3          | 4                      | 2.5                          | Water   |
| C4          | 6                      | 1.5                          | Water   |
| C5          | 6                      | 2                            | Water   |
| C6          | 6                      | 2.5                          | Water   |
| C7          | 7                      | 15                           | Water   |
| C8          | 7                      | 11.25                        | Water   |
| C9          | 7                      | 7.5                          | Water   |
| C10         | 7                      | 3.75                         | Water   |

### Gelation with Water/LiOH

Terpy-Ph-CO<sub>2</sub>H **1** (5mg) was measured into a 3.5mL sample vial, and the appropriate concentration of lithium hydroxide in water (0.5mL) was added. The vials were then sonicated in a water bath for thirty minutes to ensure all the material dissolved. No gel formation was observed.

5

| Sample Name | Weight of <b>1</b> /mg | Concentration of LiOH / M | Solvent |
|-------------|------------------------|---------------------------|---------|
| D1          | 5                      | 0.25                      | Water   |
| D2          | 5                      | 0.5                       | Water   |
| D3          | 5                      | 0.75                      | Water   |
| D4          | 5                      | 1                         | Water   |

### Gelation with Water/KOH

Terpy-Ph-CO<sub>2</sub>H **1** (5mg) was measured into a 3.5mL sample vial, and the appropriate concentration of potassium hydroxide in water (0.5mL) was added. The vials were then sonicated in a water bath for thirty  
10 minutes to ensure all the material dissolved. Gel formation was only observed at 4 °C.

| Sample Name | Weight of Terpy-Ph-CO <sub>2</sub> H /mg | Concentration of KOH /M | Solvent |
|-------------|------------------------------------------|-------------------------|---------|
| E1          | 2                                        | 0.25                    | Water   |
| E2          | 3                                        | 0.5                     | Water   |
| E3          | 5                                        | 0.75                    | Water   |
| E4          | 3                                        | 1                       | Water   |
| E5          | 5                                        | 1.5                     | Water   |

E3 fresh:

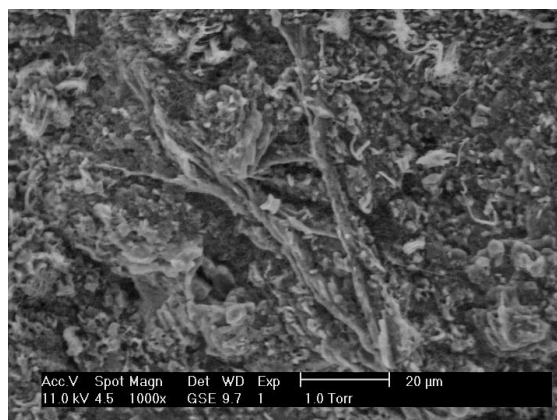

15



## Gelation Experiments with metallated Terpy-Ph-CO<sub>2</sub>H

### Metallation with Cobalt and Copper

Stock solutions of 11.4, 22.8 and 45.6mM of copper (II) and cobalt (II) chloride (giving 0.5:1, 1:1 and 2:1 ratios of metal chloride to **1** respectively) were made up in two different solvents, water and dimethyl formamide. Compound **1** (4mg) was weighed out into sample vials and the metal chloride solution (0.5mL) with appropriate solvent was added. The vials were heated to 120°C for fifteen minutes. No gel formation was observed.

| Sample Name | Weight of <b>1</b> /mg | Metal Ion (2+) | Ratio of metal ion to <b>1</b> | Solvent |
|-------------|------------------------|----------------|--------------------------------|---------|
| F1          | 4                      | Co             | 0.5                            | DMF     |
| F2          | 4                      | Co             | 1                              | DMF     |
| F3          | 4                      | Co             | 2                              | DMF     |
| F4          | 4                      | Co             | 0.5                            | Water   |
| F5          | 4                      | Co             | 1                              | Water   |
| F6          | 4                      | Co             | 2                              | Water   |
| G1          | 4                      | Cu             | 0.5                            | DMF     |
| G2          | 4                      | Cu             | 1                              | DMF     |
| G3          | 4                      | Cu             | 2                              | DMF     |
| G4          | 4                      | Cu             | 0.5                            | Water   |
| G5          | 4                      | Cu             | 1                              | Water   |
| G6          | 4                      | Cu             | 2                              | Water   |

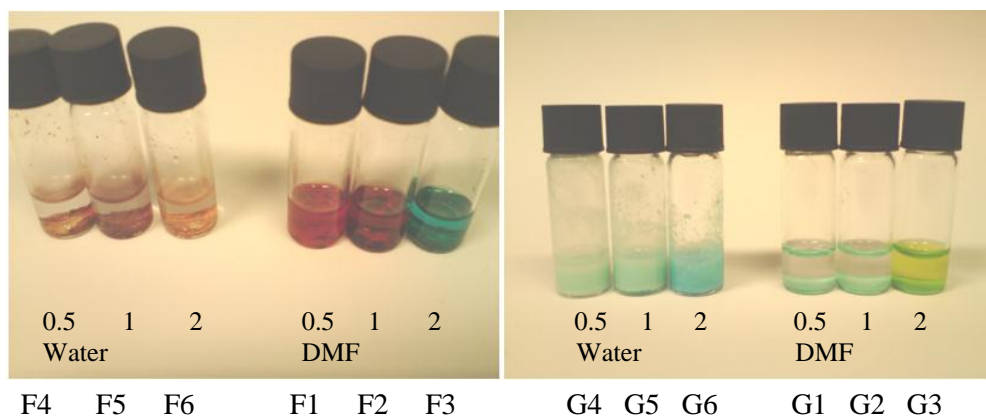

## 5 Water Absorption and 18-crown-6 Experiments

A B13 sample gel and a B16 sample gel (see above) were prepared in 5mL vials. They were heated at 75°C for fifteen minutes and left to cool to room temperature; water (0.25mL) was placed on top of the gels and the vials<sub>5</sub> were left to rest on a flat surface.

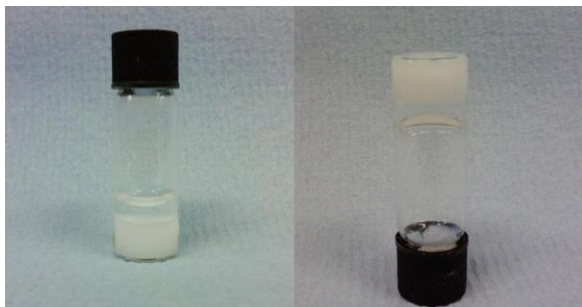

Supplement: c2cc37842f.pdf [file c2cc37842f.pdf]
